# Supplementary material
Source: PubMed Central journal article supplement (PMC9381126)
Supplement: mcr-21-0149_supplementary_table_1_supptables1.pdf [file mcr-21-0149_supplementary_table_1_supptables1.pdf]

Supplementary Table 1. Combination indices for the NSC59984 and BSO treatment on cell viability in cells

| NSC59984<br>( $\mu\text{mol/L}$ ) | BSO<br>( $\mu\text{mol/L}$ ) | Combination index (CI) |      |
|-----------------------------------|------------------------------|------------------------|------|
|                                   |                              | SW480                  | Wi38 |
| 6                                 | 1                            | 0.67                   | 8    |
| 6                                 | 2.5                          | 0.52                   | 15   |

Combination index (CI) <1, =1 and >1 indicate synergism, additive effect and antagonism in drug combination treatment.
