# Supplementary material
Source: PubMed Central journal article supplement (PMC9381126)

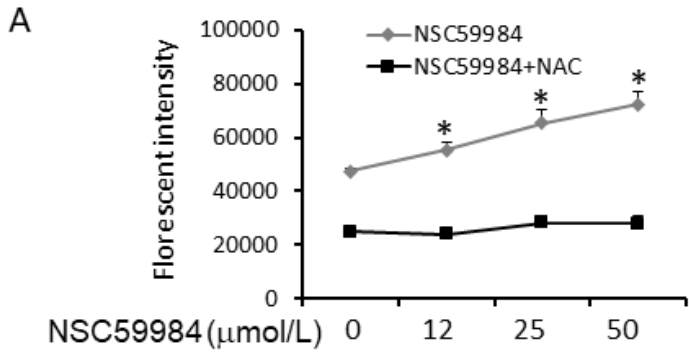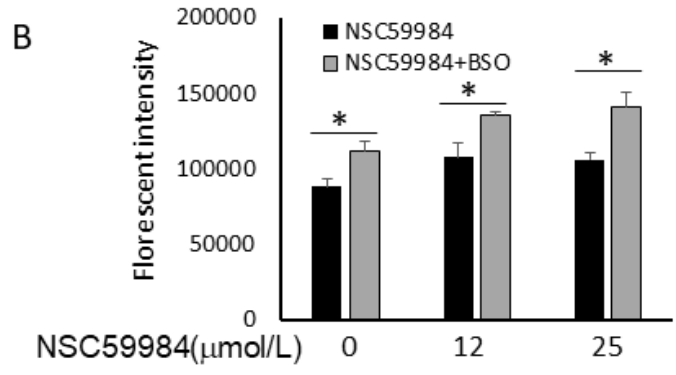

Supplementary S2

Supplement: mcr-21-0149_supplementary_figure_2_supp2.pdf [file mcr-21-0149_supplementary_figure_2_supp2.pdf]

A

|             |   |    |    |    |   |   |    |    |   |     |     |     |
|-------------|---|----|----|----|---|---|----|----|---|-----|-----|-----|
| NSC59984    | 0 | 12 | 25 | 50 | - | - | -  | -  | - | -   | -   | -   |
| Cisplatin   | - | -  | -  | -  | 0 | 5 | 10 | 20 | - | -   | -   | -   |
| Doxorubicin | - | -  | -  | -  | - | - | -  | -  | 0 | 0.2 | 0.4 | 0.8 |

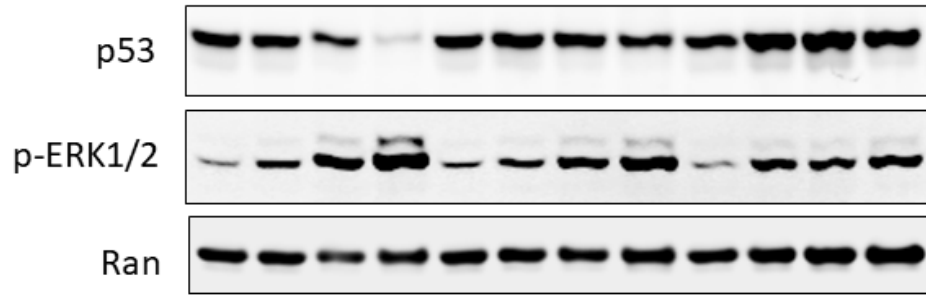

B

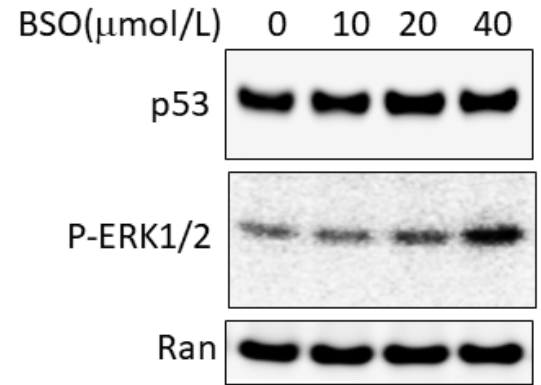

C

|                                                     |   |    |    |    |    |    |    |    |    |    |    |    |
|-----------------------------------------------------|---|----|----|----|----|----|----|----|----|----|----|----|
| H <sub>2</sub> O <sub>2</sub> ( $\mu\text{mol/L}$ ) | 0 | 0  | 0  | 12 | 12 | 12 | 25 | 25 | 25 | 50 | 50 | 50 |
| NSC59984( $\mu\text{mol/L}$ )                       | 0 | 12 | 25 | 0  | 12 | 25 | 0  | 12 | 25 | 0  | 12 | 25 |

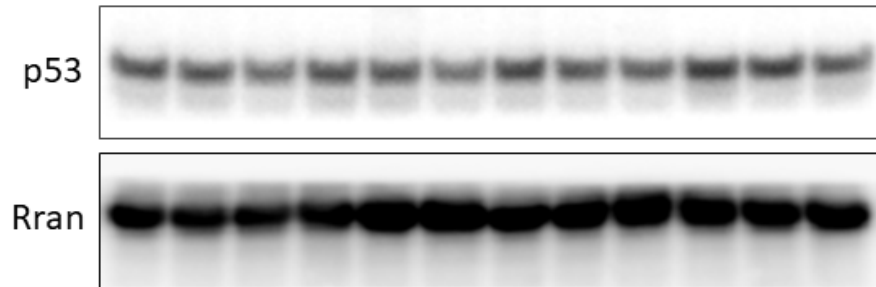

Supplement: mcr-21-0149_supplementary_figure_3_supp3.pdf [file mcr-21-0149_supplementary_figure_3_supp3.pdf]

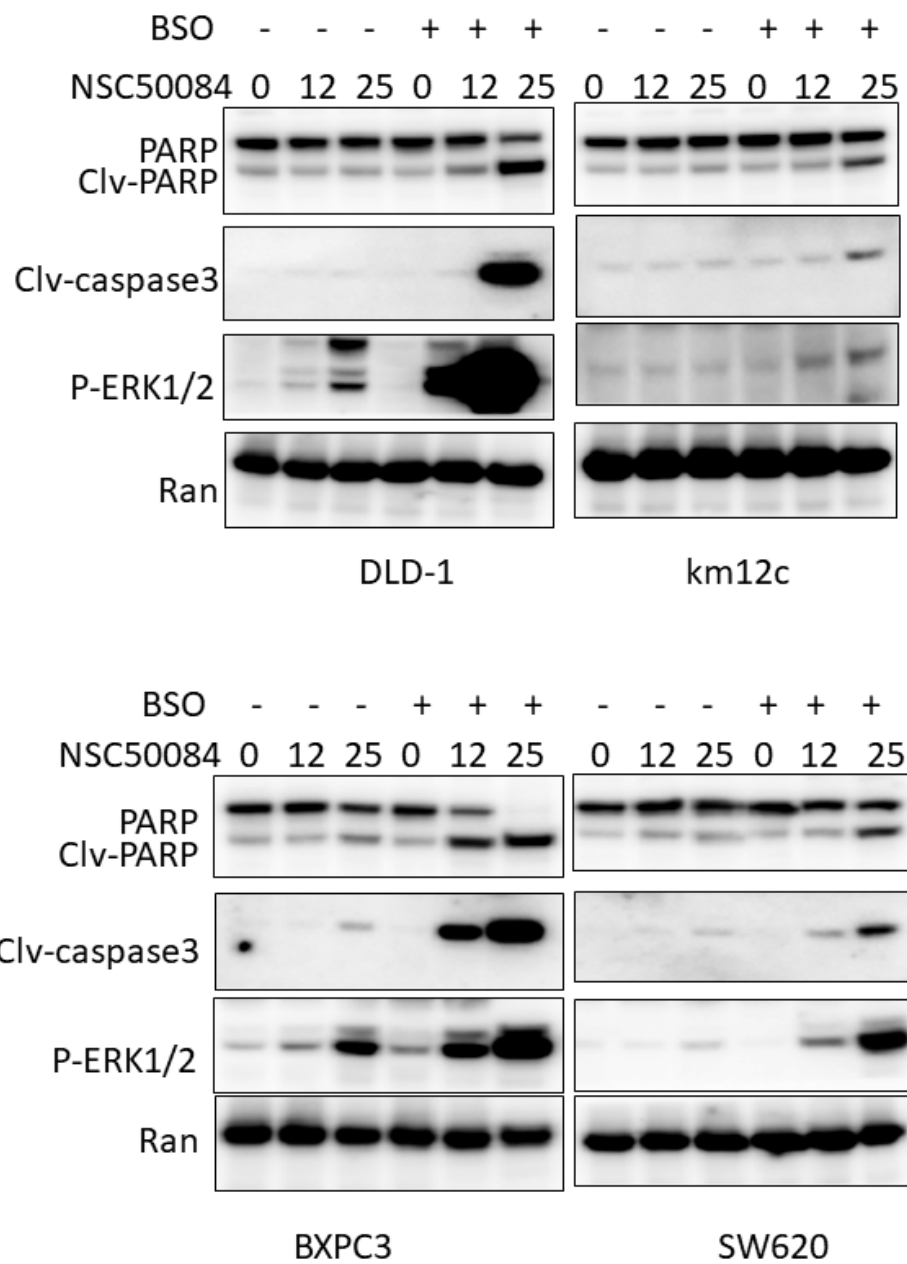

Supplementary Figure S4

Supplement: mcr-21-0149_supplementary_figure_4_supp4.pdf [file mcr-21-0149_supplementary_figure_4_supp4.pdf]

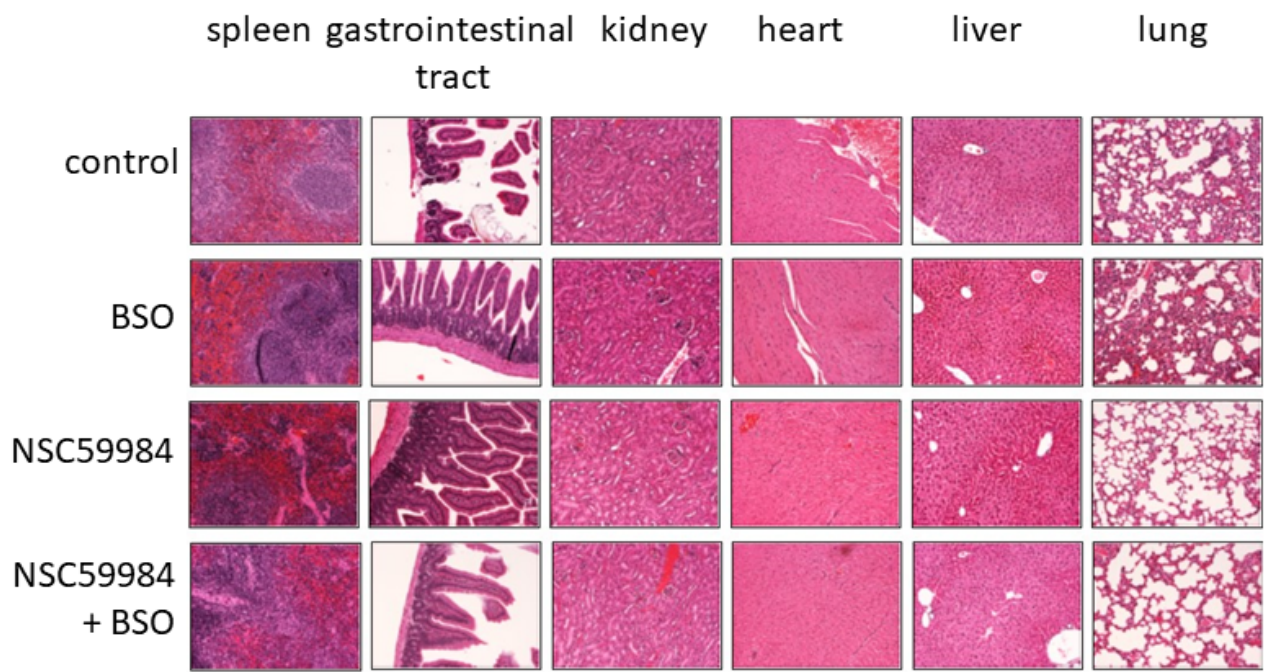

Supplementary Figure S5

Supplement: mcr-21-0149_supplementary_figure_5_supp5.pdf [file mcr-21-0149_supplementary_figure_5_supp5.pdf]
